# Supplementary material
Source: Springer Nature journal article supplement (https://www.springerprofessional.de/resource/supplementary/40327_2013_5_MOESM2_ESM.pdf/10801436)
Supplement: MOESM2 [file 10801436]

## Bootstrapping

- Create a 3D point cloud
- Align it to cyber-information
- Run HD<sup>4</sup>AR server

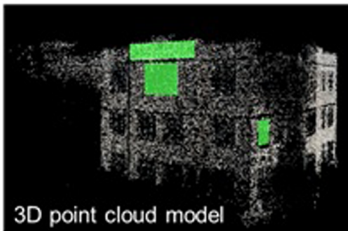

## High-precision Vision-based Augmented Reality

### HD<sup>4</sup>AR Client

- 1 User takes a photo
- 2 Upload it to server

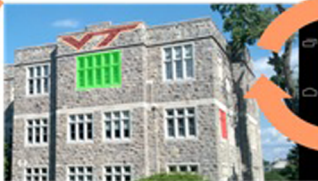

- 6 Overlay cyber objects

### HD<sup>4</sup>AR Server

- 3 Localize the user

Feature Detection of New Image

Feature Matching against 3D point cloud

Camera Pose Recovery

- 4 Determine objects within user's view
- 5 Send them back to user
